# Supplementary material
Source: PubMed Central journal article supplement (PMC3044685)
Supplement: pgen.1002004.s002.pdf [file pgen.1002004.s002.pdf]

**SNP** rs864537 (chr. 1, 165678008 bp)**Probe** 6290400 (chr. 1, 165665509 - 165755456 bp), CD247**P-Value** 3.5E-11**P-Value Abs.** 3.5E-11**BloodHT12****BloodH8v2**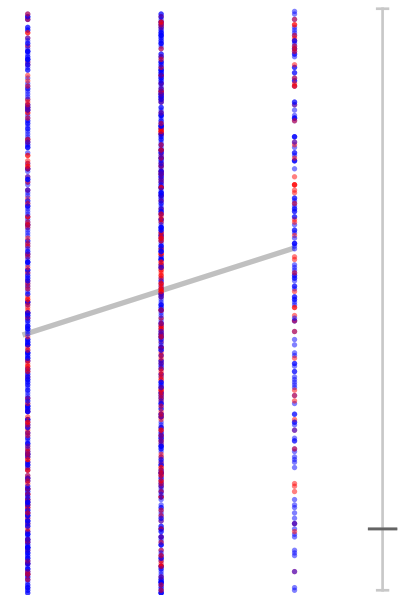

AA (481) AG (572) GG (187)

**Corr:** 0.174**R2:** 0.03**Z-Score:** 6.167**P-Value:** 6.98E-10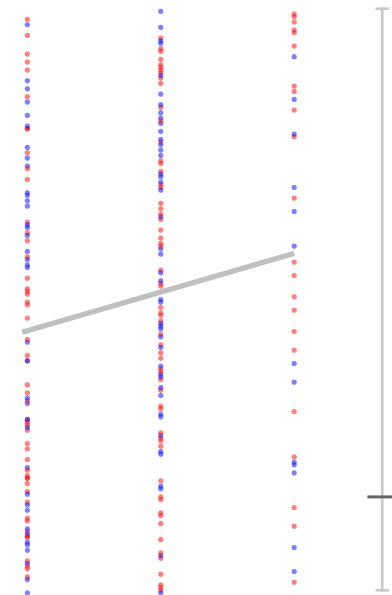

AA (89) AG (105) GG (35)

**Corr:** 0.16**R2:** 0.026**Z-Score:** 2.43**P-Value:** 0.015

**SNP** rs3748816 (chr. 1, 2516606 bp)  
**Probe** 2070246 (chr. 1, 2510941 - 2555289 bp), MMEL1  
**P-Value** 3.76E-20 **P-Value Abs.** 3.76E-20

## BloodHT12

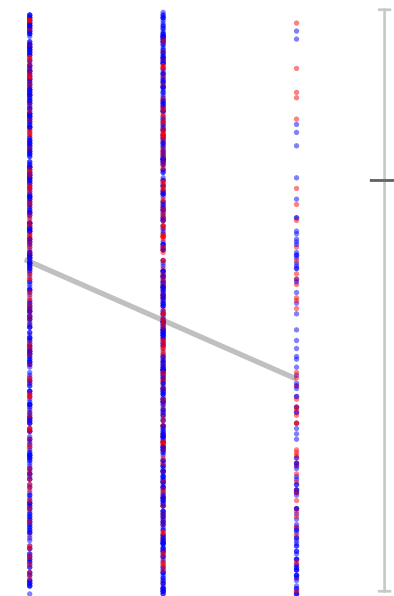

AA (523) AG (572) GG (145)  
**Corr:** -0.23 **R2:** 0.053  
**Z-Score:** -8.199 **P-Value:** 2.42E-16

## BloodH8v2

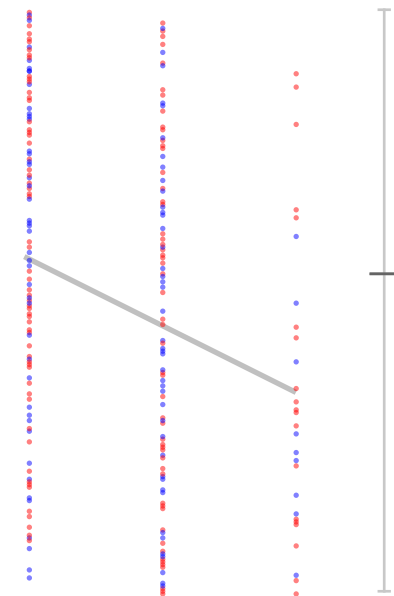

AA (104) AG (97) GG (28)  
**Corr:** -0.274 **R2:** 0.075  
**Z-Score:** -4.201 **P-Value:** 2.66E-5

**SNP** rs1953126 (chr. 9, 122680321 bp)  
**Probe** 2810202 (chr. 9, 122671875 - 122671875 bp), -  
**P-Value** 0.005 **P-Value Abs.** 4.7E-3

## BloodHT12

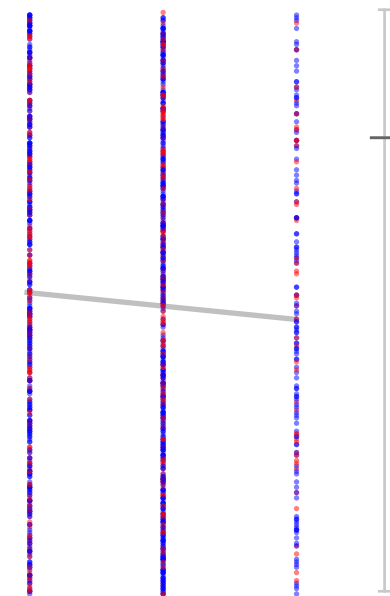

CC (491) CT (576) TT (173)

**Corr:** -0.052 **R2:** 0.003

**Z-Score:** -1.832 **P-Value:** 0.067

## BloodH8v2

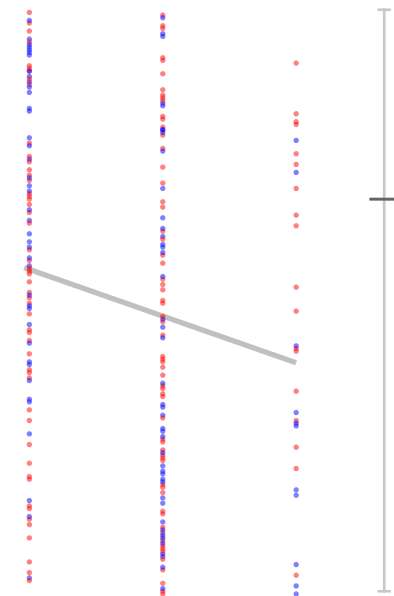

CC (93) CT (107) TT (29)

**Corr:** -0.191 **R2:** 0.037

**Z-Score:** -2.906 **P-Value:** 0.004

**SNP** rs11203203 (chr. 21, 42709255 bp)  
**Probe** 6980470 (chr. 21, 42675193 - 42675193 bp), -  
**P-Value** 0.004 **P-Value Abs.** 4.01E-3

## BloodHT12

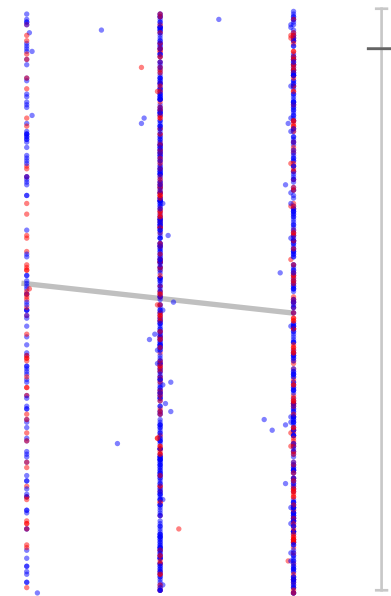

AA (161) AG (584) GG (495)

**Corr:** -0.059 **R2:** 0.003

**Z-Score:** -2.069 **P-Value:** 0.039

## BloodH8v2

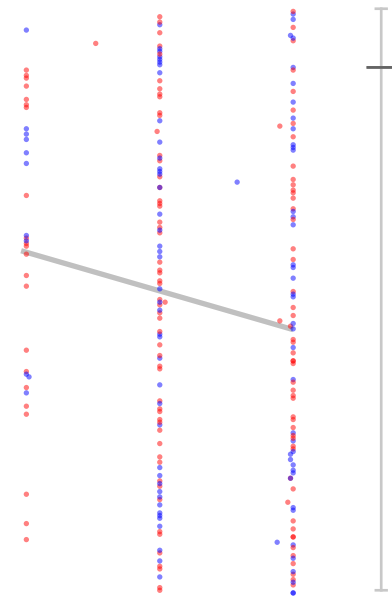

AA (33) AG (99) GG (97)

**Corr:** -0.162 **R2:** 0.026

**Z-Score:** -2.456 **P-Value:** 0.014

**SNP** rs212388 (chr. 6, 159410424 bp)  
**Probe** 5360364 (chr. 6, 159375017 - 159387172 bp), TAGAP  
**P-Value** 0.003 **P-Value Abs.** 3.08E-3

**BloodHT12**

**BloodH8v2**

**eQTL not available**

Probe not present.

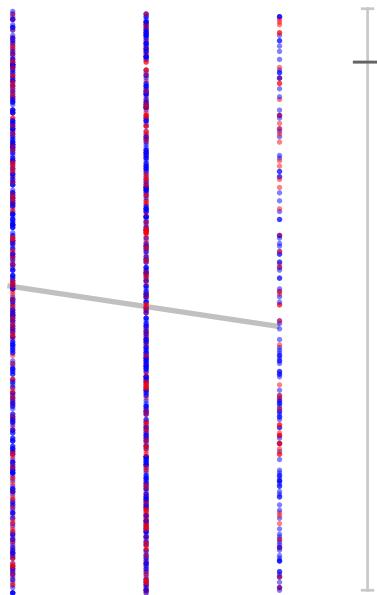

TT (490) TC (565) CC (185)

**Corr:** -0.084 **R2:** 0.007

**Z-Score:** -2.955 **P-Value:** 0.003

**SNP** rs653178 (chr. 12, 110492139 bp)  
**Probe** 840253 (chr. 12, 110687729 - 110733165 bp), ALDH2  
**P-Value** 1.33E-4 **P-Value Abs.** 1.33E-4

## BloodHT12

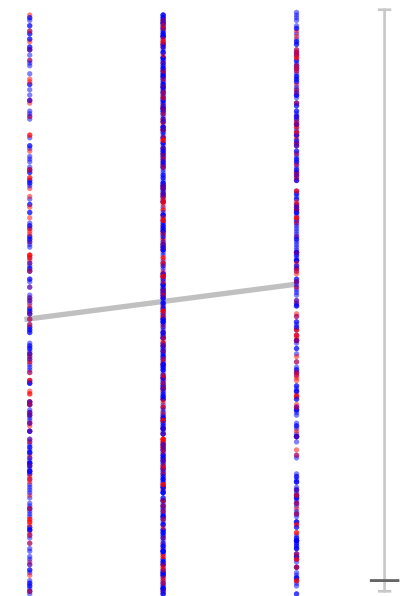

CC (267) CT (622) TT (351)

**Corr:** 0.072 **R2:** 0.005

**Z-Score:** 2.535 **P-Value:** 0.011

## BloodH8v2

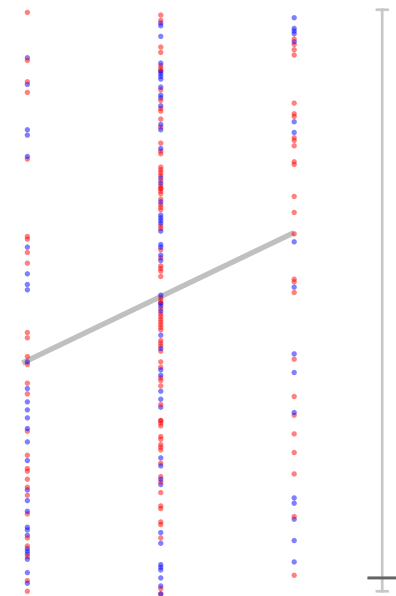

CC (57) CT (129) TT (43)

**Corr:** 0.247 **R2:** 0.061

**Z-Score:** 3.769 **P-Value:** 1.64E-4

**SNP** rs3748816 (chr. 1, 2516606 bp)

**Probe** Human\_RefSeq-8\_v2-6250338 (chr. 1, 2507097 - 2513762 bp), C1orf93

**P-Value** 1.16E-4

**P-Value Abs.** 1.16E-4

**BloodHT12**

**BloodH8v2**

**eQTL not available**

Probe not present.

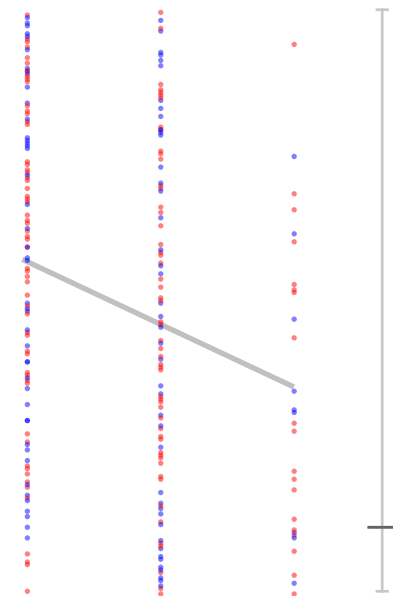

AA (104) AG (97) GG (28)

**Corr:** -0.252 **R2:** 0.063

**Z-Score:** -3.85 **P-Value:** 1.18E-4

**SNP** rs1953126 (chr. 9, 122680321 bp)  
**Probe** 1340241 (chr. 9, 122753437 - 122853375 bp), C5  
**P-Value** 2.03E-5 **P-Value Abs.** 2.03E-5

## BloodHT12

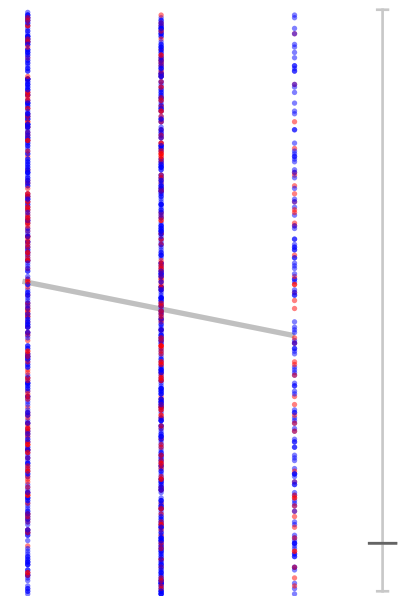

CC (491) CT (576) TT (173)  
**Corr:** -0.107 **R2:** 0.011  
**Z-Score:** -3.762 **P-Value:** 1.69E-4

## BloodH8v2

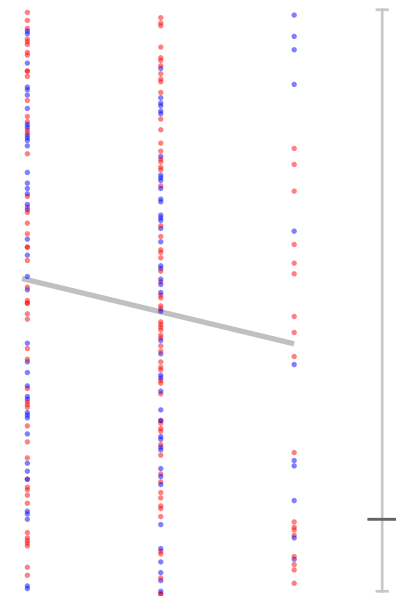

CC (93) CT (107) TT (29)  
**Corr:** -0.133 **R2:** 0.018  
**Z-Score:** -2.013 **P-Value:** 0.044

**SNP** rs3748816 (chr. 1, 2516606 bp)  
**Probe** 6520725 (chr. 1, 2478153 - 2487757 bp), TNFRSF14  
**P-Value** 1.58E-6 **P-Value Abs.** 1.58E-6

**BloodHT12**

**BloodH8v2**

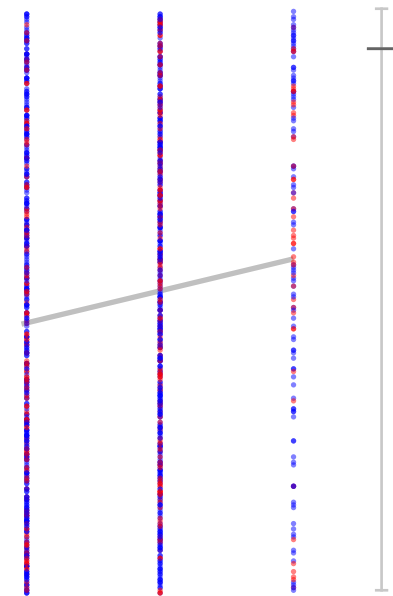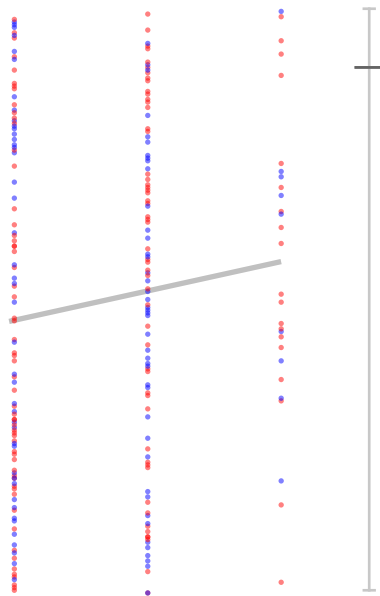

AA (523) AG (572) GG (145)  
**Corr:** 0.127 **R2:** 0.016  
**Z-Score:** 4.498 **P-Value:** 6.86E-6

AA (104) AG (97) GG (28)  
**Corr:** 0.114 **R2:** 0.013  
**Z-Score:** 1.728 **P-Value:** 0.084

**SNP** rs3748816 (chr. 1, 2516606 bp)  
**Probe** 650452 (chr. 1, 2396614 - 2427829 bp), PLCH2  
**P-Value** 1.07E-6 **P-Value Abs.** 1.07E-6

**BloodHT12**

**BloodH8v2**

**eQTL not available**

Probe not present.

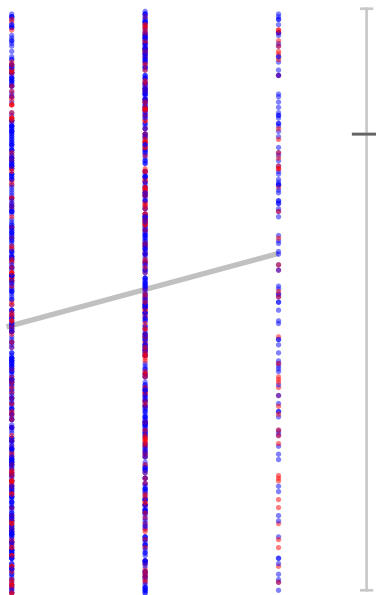

AA (523) AG (572) GG (145)  
**Corr:** 0.138 **R2:** 0.019  
**Z-Score:** 4.886 **P-Value:** 1.03E-6

**SNP** rs1953126 (chr. 9, 122680321 bp)  
**Probe** 2570091 (chr. 9, 122656752 - 122680427 bp), PHF19  
**P-Value** 4.46E-7 **P-Value Abs.** 4.46E-7

## BloodHT12

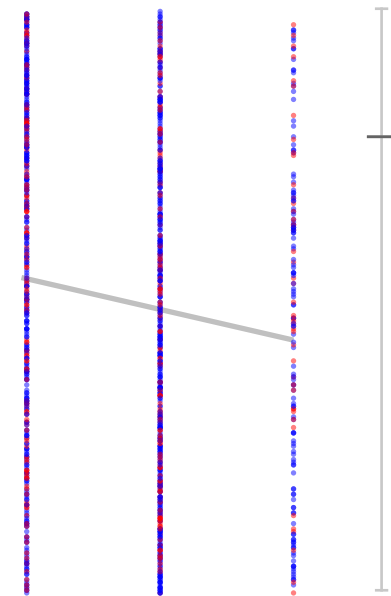

CC (491) CT (576) TT (173)  
**Corr:** -0.122 **R2:** 0.015  
**Z-Score:** -4.298 **P-Value:** 1.72E-5

## BloodH8v2

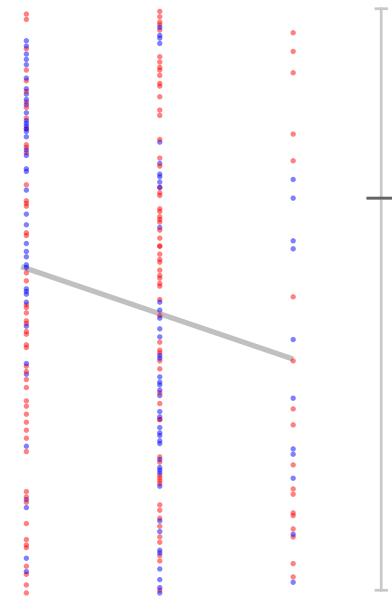

CC (93) CT (107) TT (29)  
**Corr:** -0.182 **R2:** 0.033  
**Z-Score:** -2.764 **P-Value:** 0.006

**SNP** rs653178 (chr. 12, 110492139 bp)  
**Probe** 6560301 (chr. 12, 110350268 - 110448836 bp), SH2B3///ATXN2  
**P-Value** 2.32E-7 **P-Value Abs.** 2.32E-7

### BloodHT12

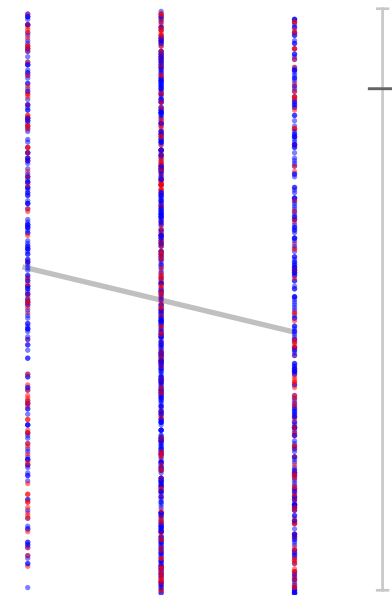

CC (267) CT (622) TT (351)  
**Corr:** -0.133 **R2:** 0.018  
**Z-Score:** -4.691 **P-Value:** 2.72E-6

### BloodH8v2

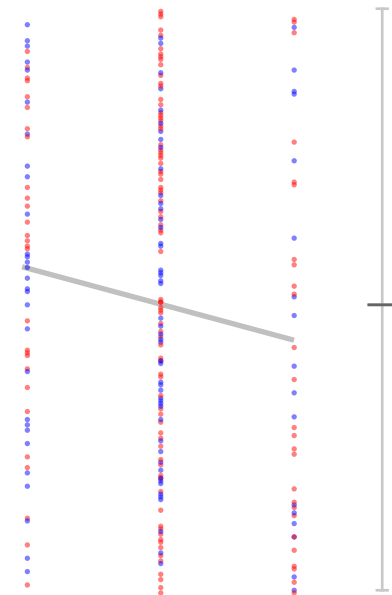

CC (57) CT (129) TT (43)  
**Corr:** -0.143 **R2:** 0.02  
**Z-Score:** -2.163 **P-Value:** 0.031

**SNP** rs1953126 (chr. 9, 122680321 bp)  
**Probe** 4570768 (chr. 9, 122703493 - 122731868 bp), TRAF1  
**P-Value** 1.61E-8 **P-Value Abs.** 1.61E-8

## BloodHT12

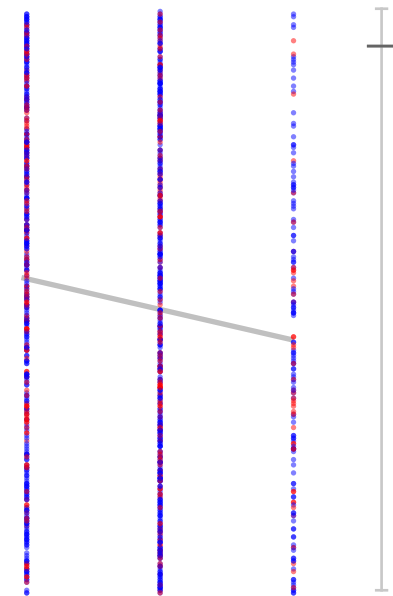

CC (491) CT (576) TT (173)  
**Corr:** -0.122 **R2:** 0.015  
**Z-Score:** -4.316 **P-Value:** 1.59E-5

## BloodH8v2

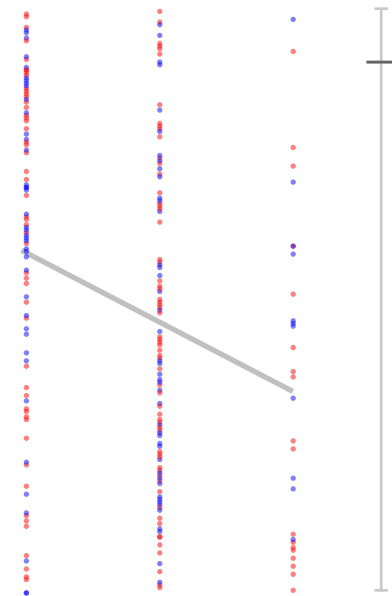

CC (93) CT (107) TT (29)  
**Corr:** -0.279 **R2:** 0.078  
**Z-Score:** -4.289 **P-Value:** 1.79E-5

**SNP** rs11203203 (chr. 21, 42709255 bp)  
**Probe** 3830220 (chr. 21, 42696088 - 42741843 bp), UBASH3A  
**P-Value** 8.68E-10 **P-Value Abs.** 8.68E-10

**BloodHT12**

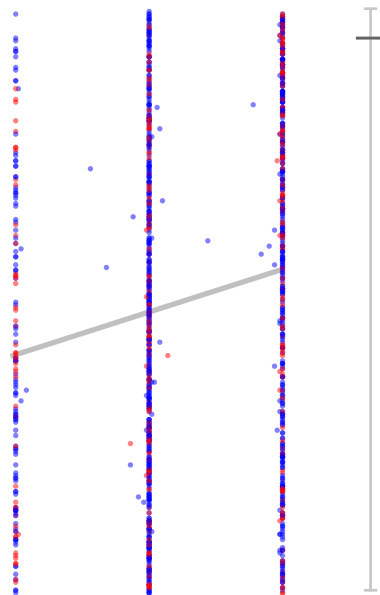

**BloodH8v2**

**eQTL not available**

Probe not present.

AA (161) AG (584) GG (495)

**Corr:** 0.173 **R2:** 0.03  
**Z-Score:** 6.142 **P-Value:** 8.17E-10

**SNP** rs864537 (chr. 1, 165678008 bp)  
**Probe** 3890689 (chr. 1, 165665509 - 165755456 bp), CD247  
**P-Value** 1.36E-10 **P-Value Abs.** 1.36E-10

**BloodHT12**

**BloodH8v2**

**eQTL not available**

Probe not present.

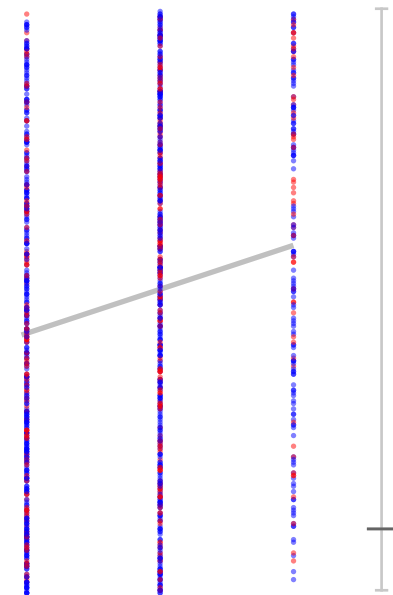

AA (481) AG (572) GG (187)

**Corr:** 0.181 **R2:** 0.033  
**Z-Score:** 6.429 **P-Value:** 1.28E-10

**SNP** rs2298428 (chr. 22, 20312892 bp)  
**Probe** 1230242 (chr. 22, 20308188 - 20308188 bp), -  
**P-Value** 2.03E-99 **P-Value Abs.** 2.03E-99

## BloodHT12

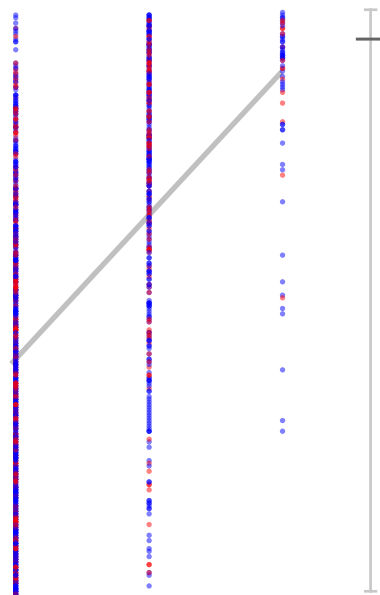

**CC (797) CT (380) TT (63)**  
**Corr:** 0.502 **R2:** 0.252  
**Z-Score:** 17.244 **P-Value:** 2.69E-80

## BloodH8v2

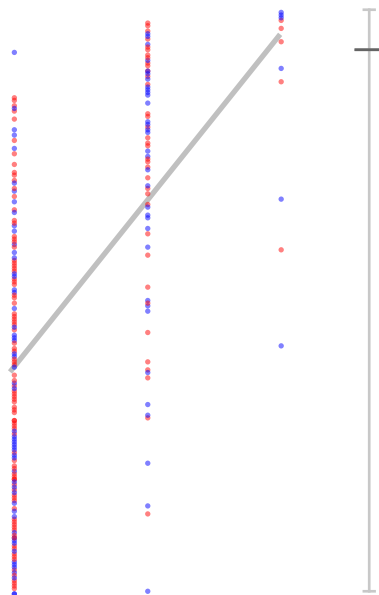

**CC (148) CT (70) TT (11)**  
**Corr:** 0.573 **R2:** 0.328  
**Z-Score:** 9.497 **P-Value:** 2.17E-21
