# Supplementary material
Source: PubMed Central journal article supplement (PMC3044685)

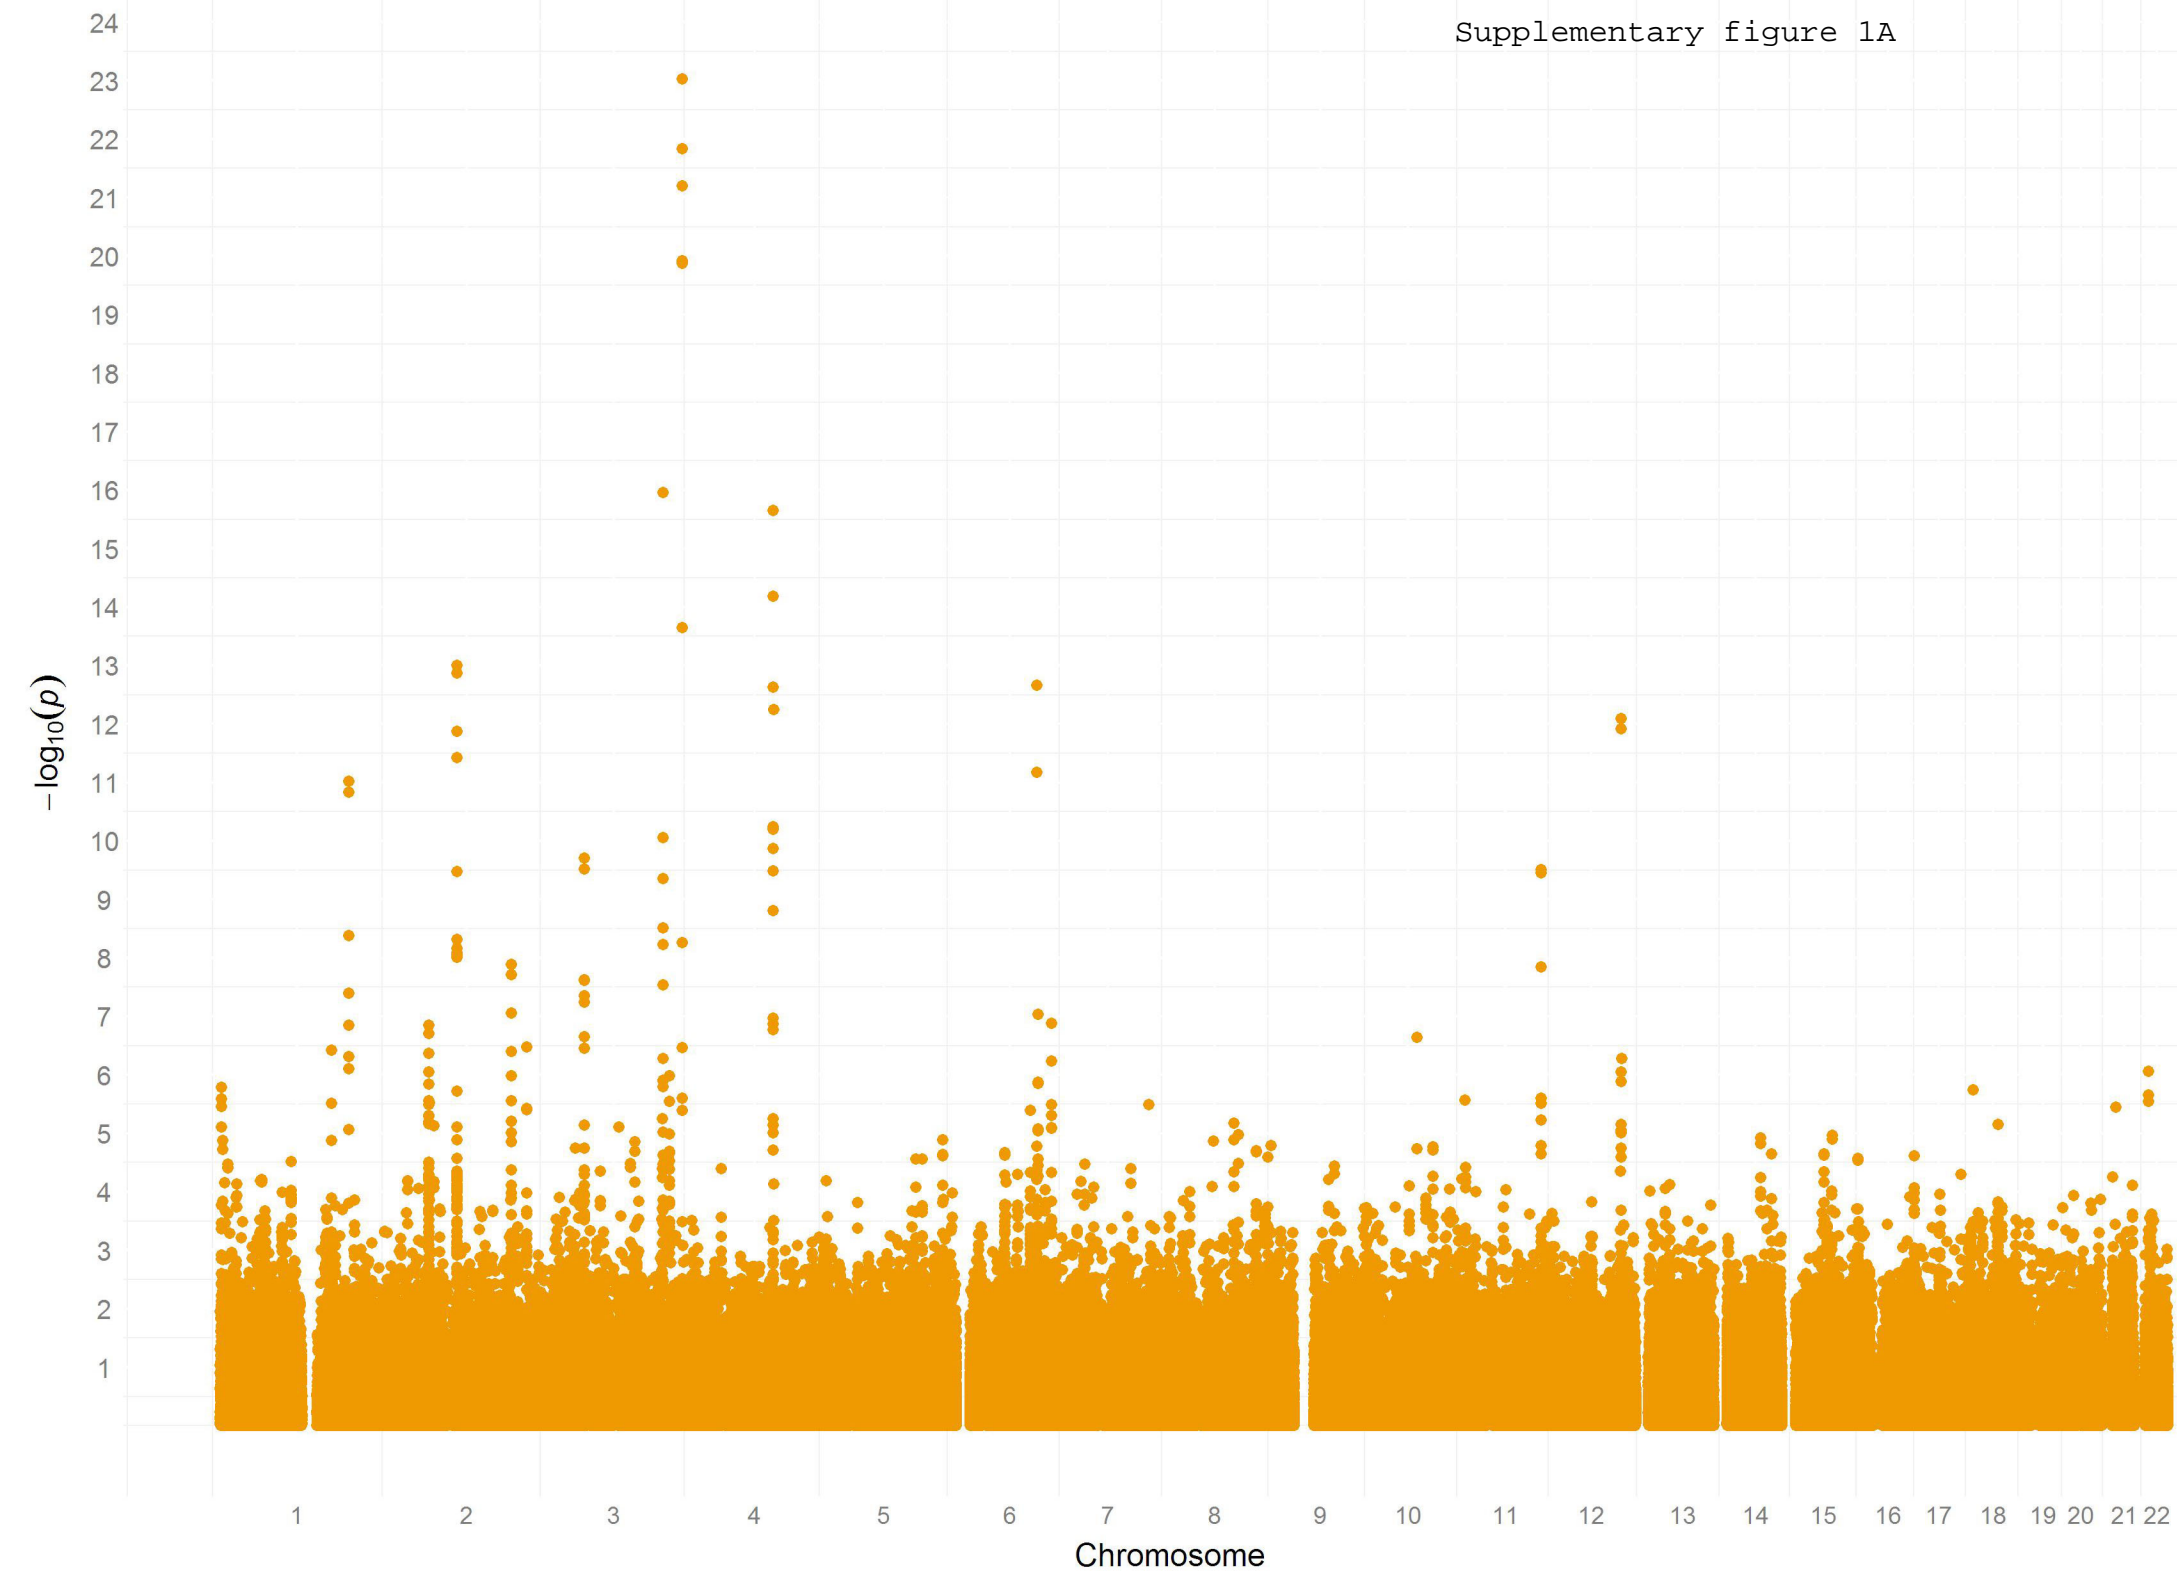

Supplementary figure 1B

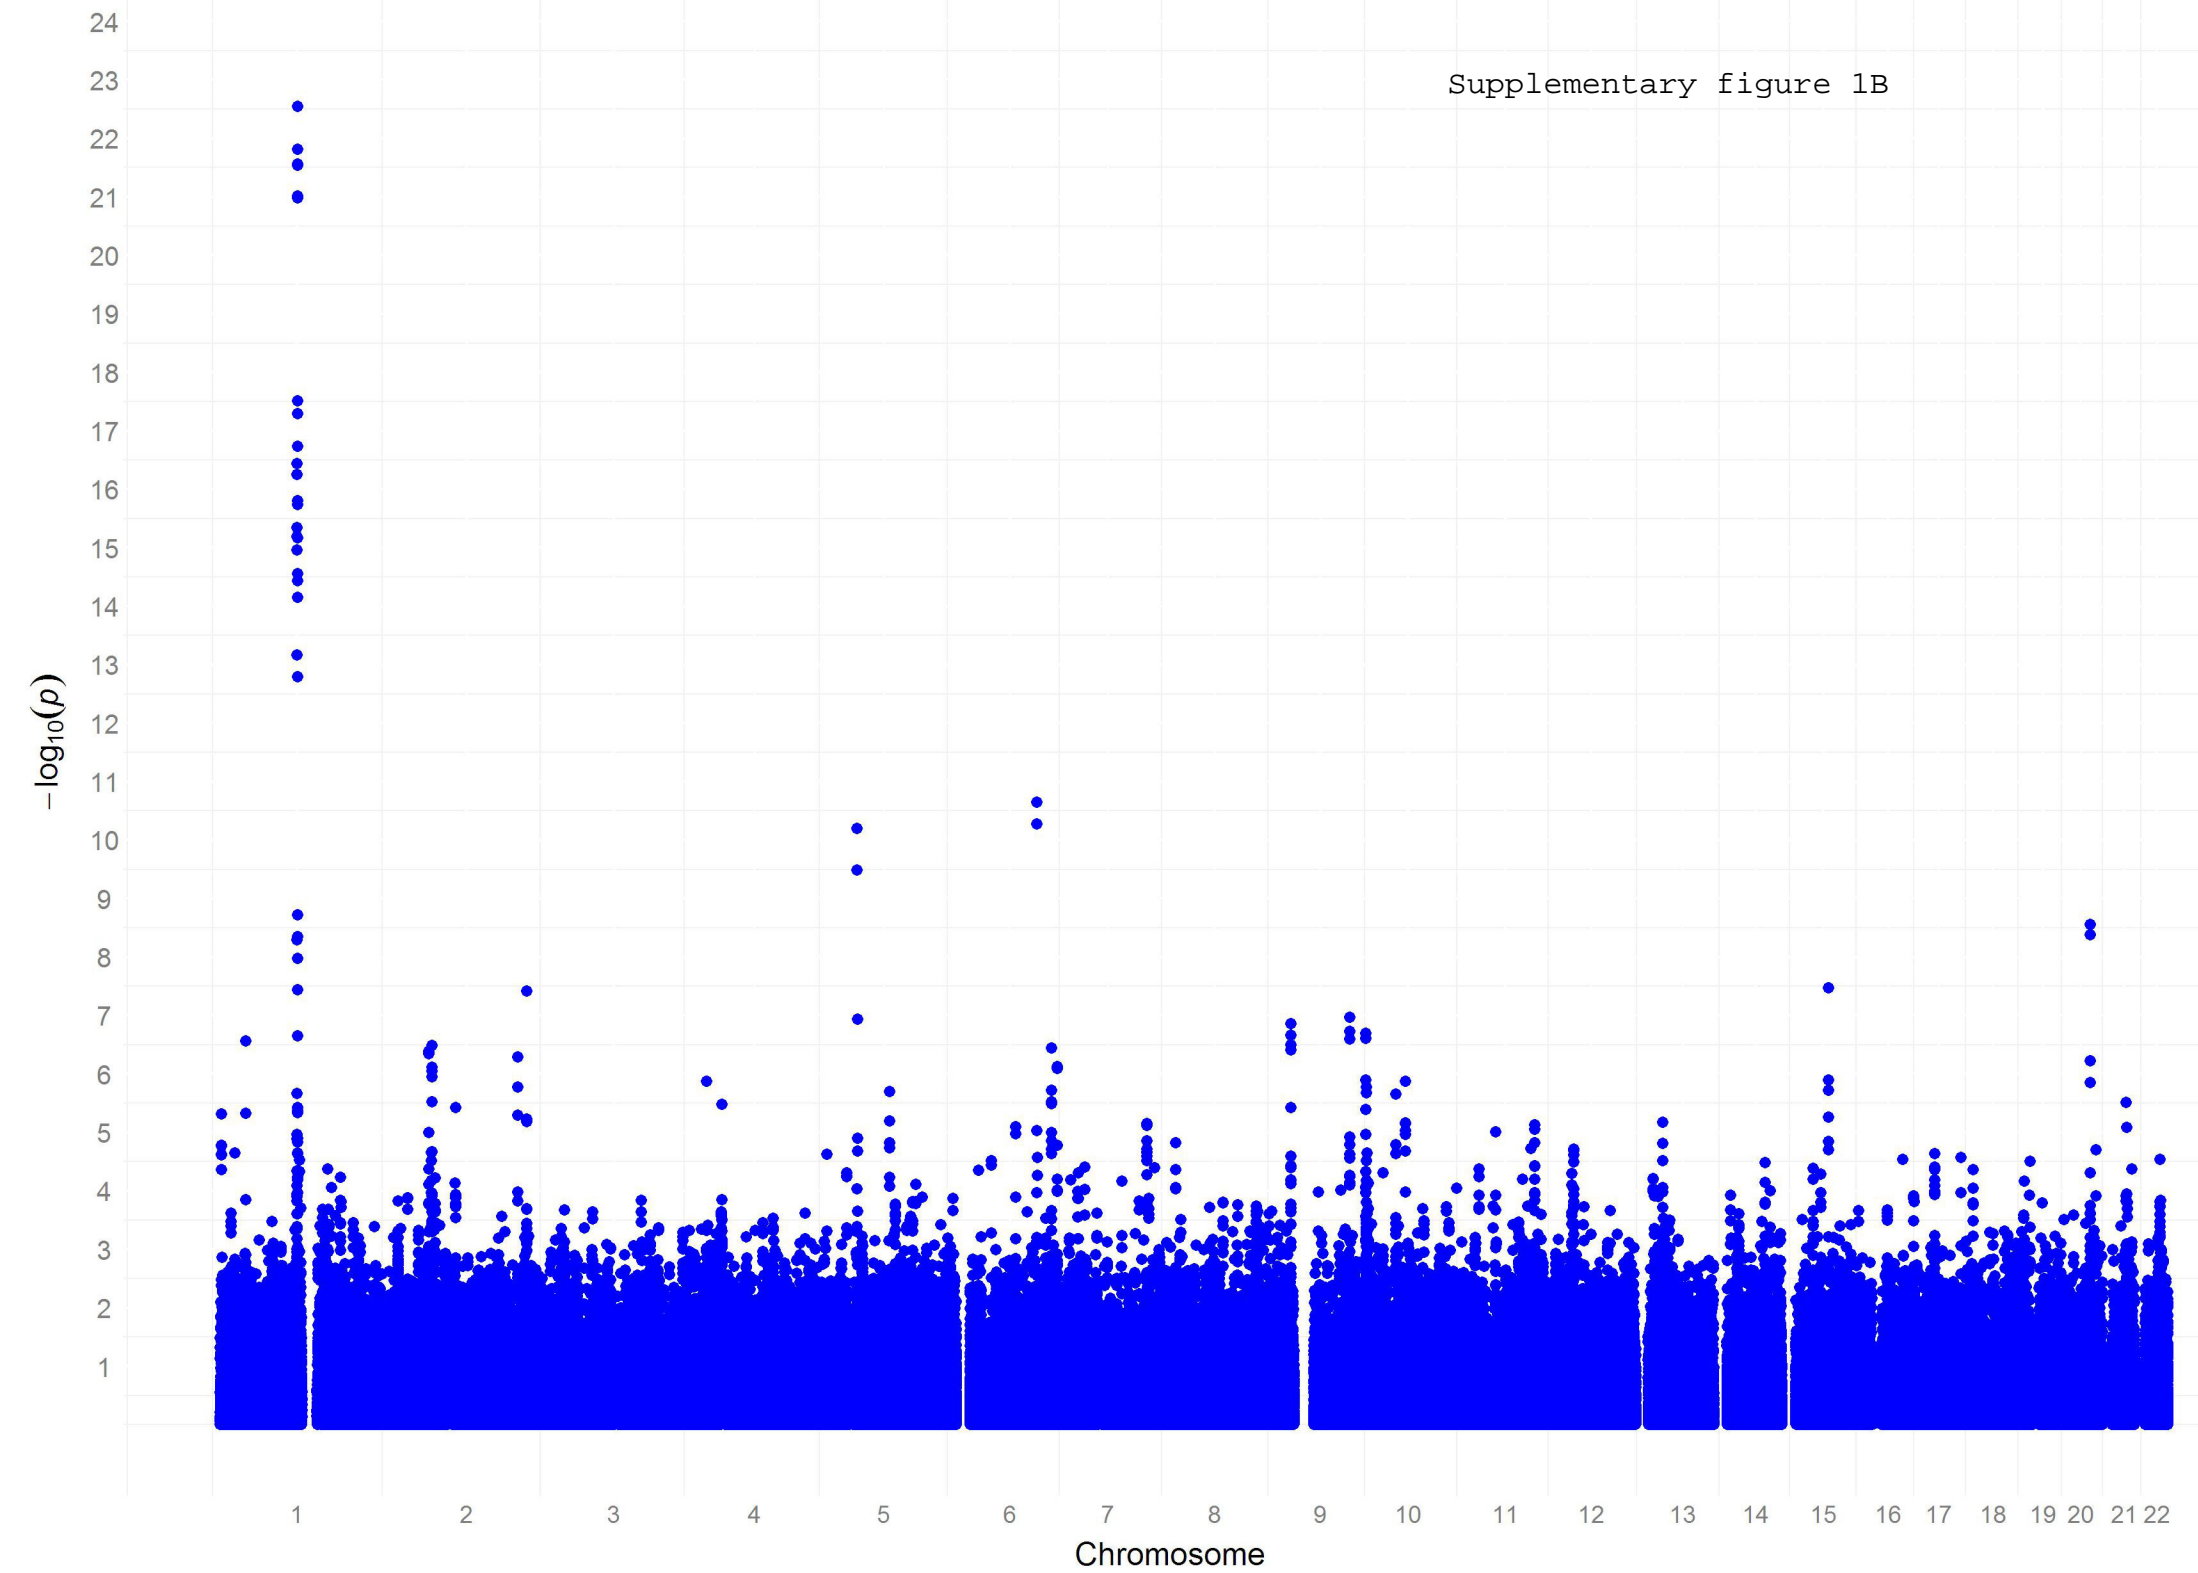

Supplementary figure 1C

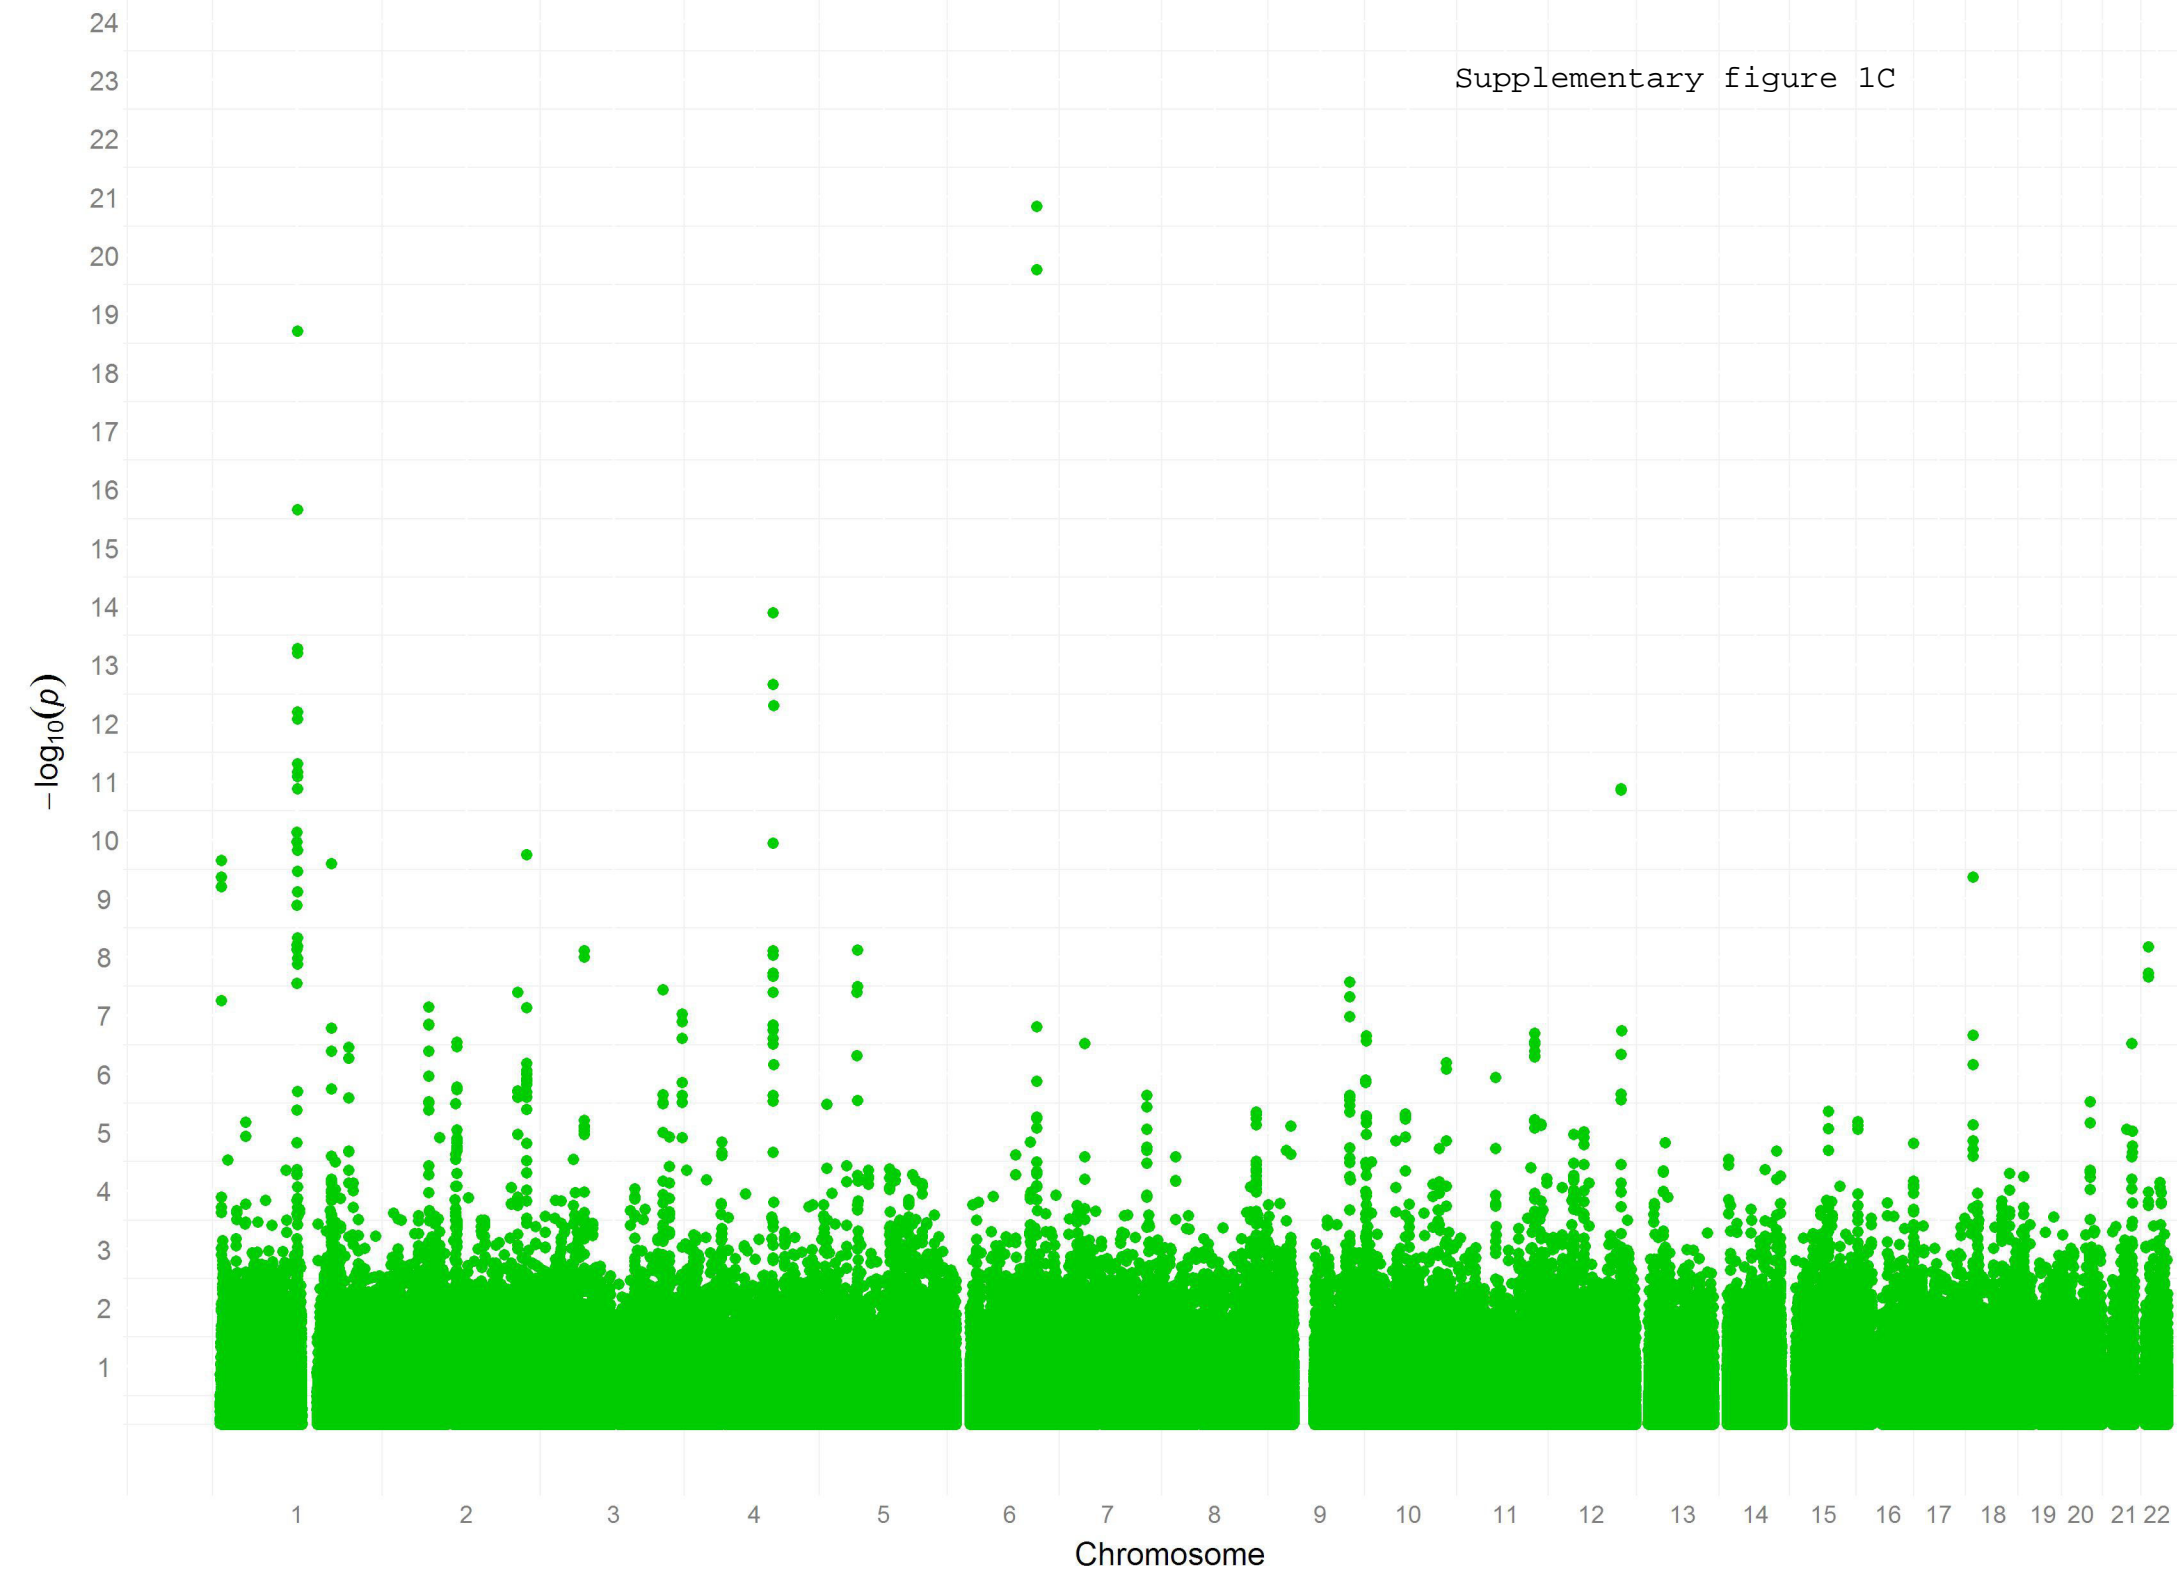

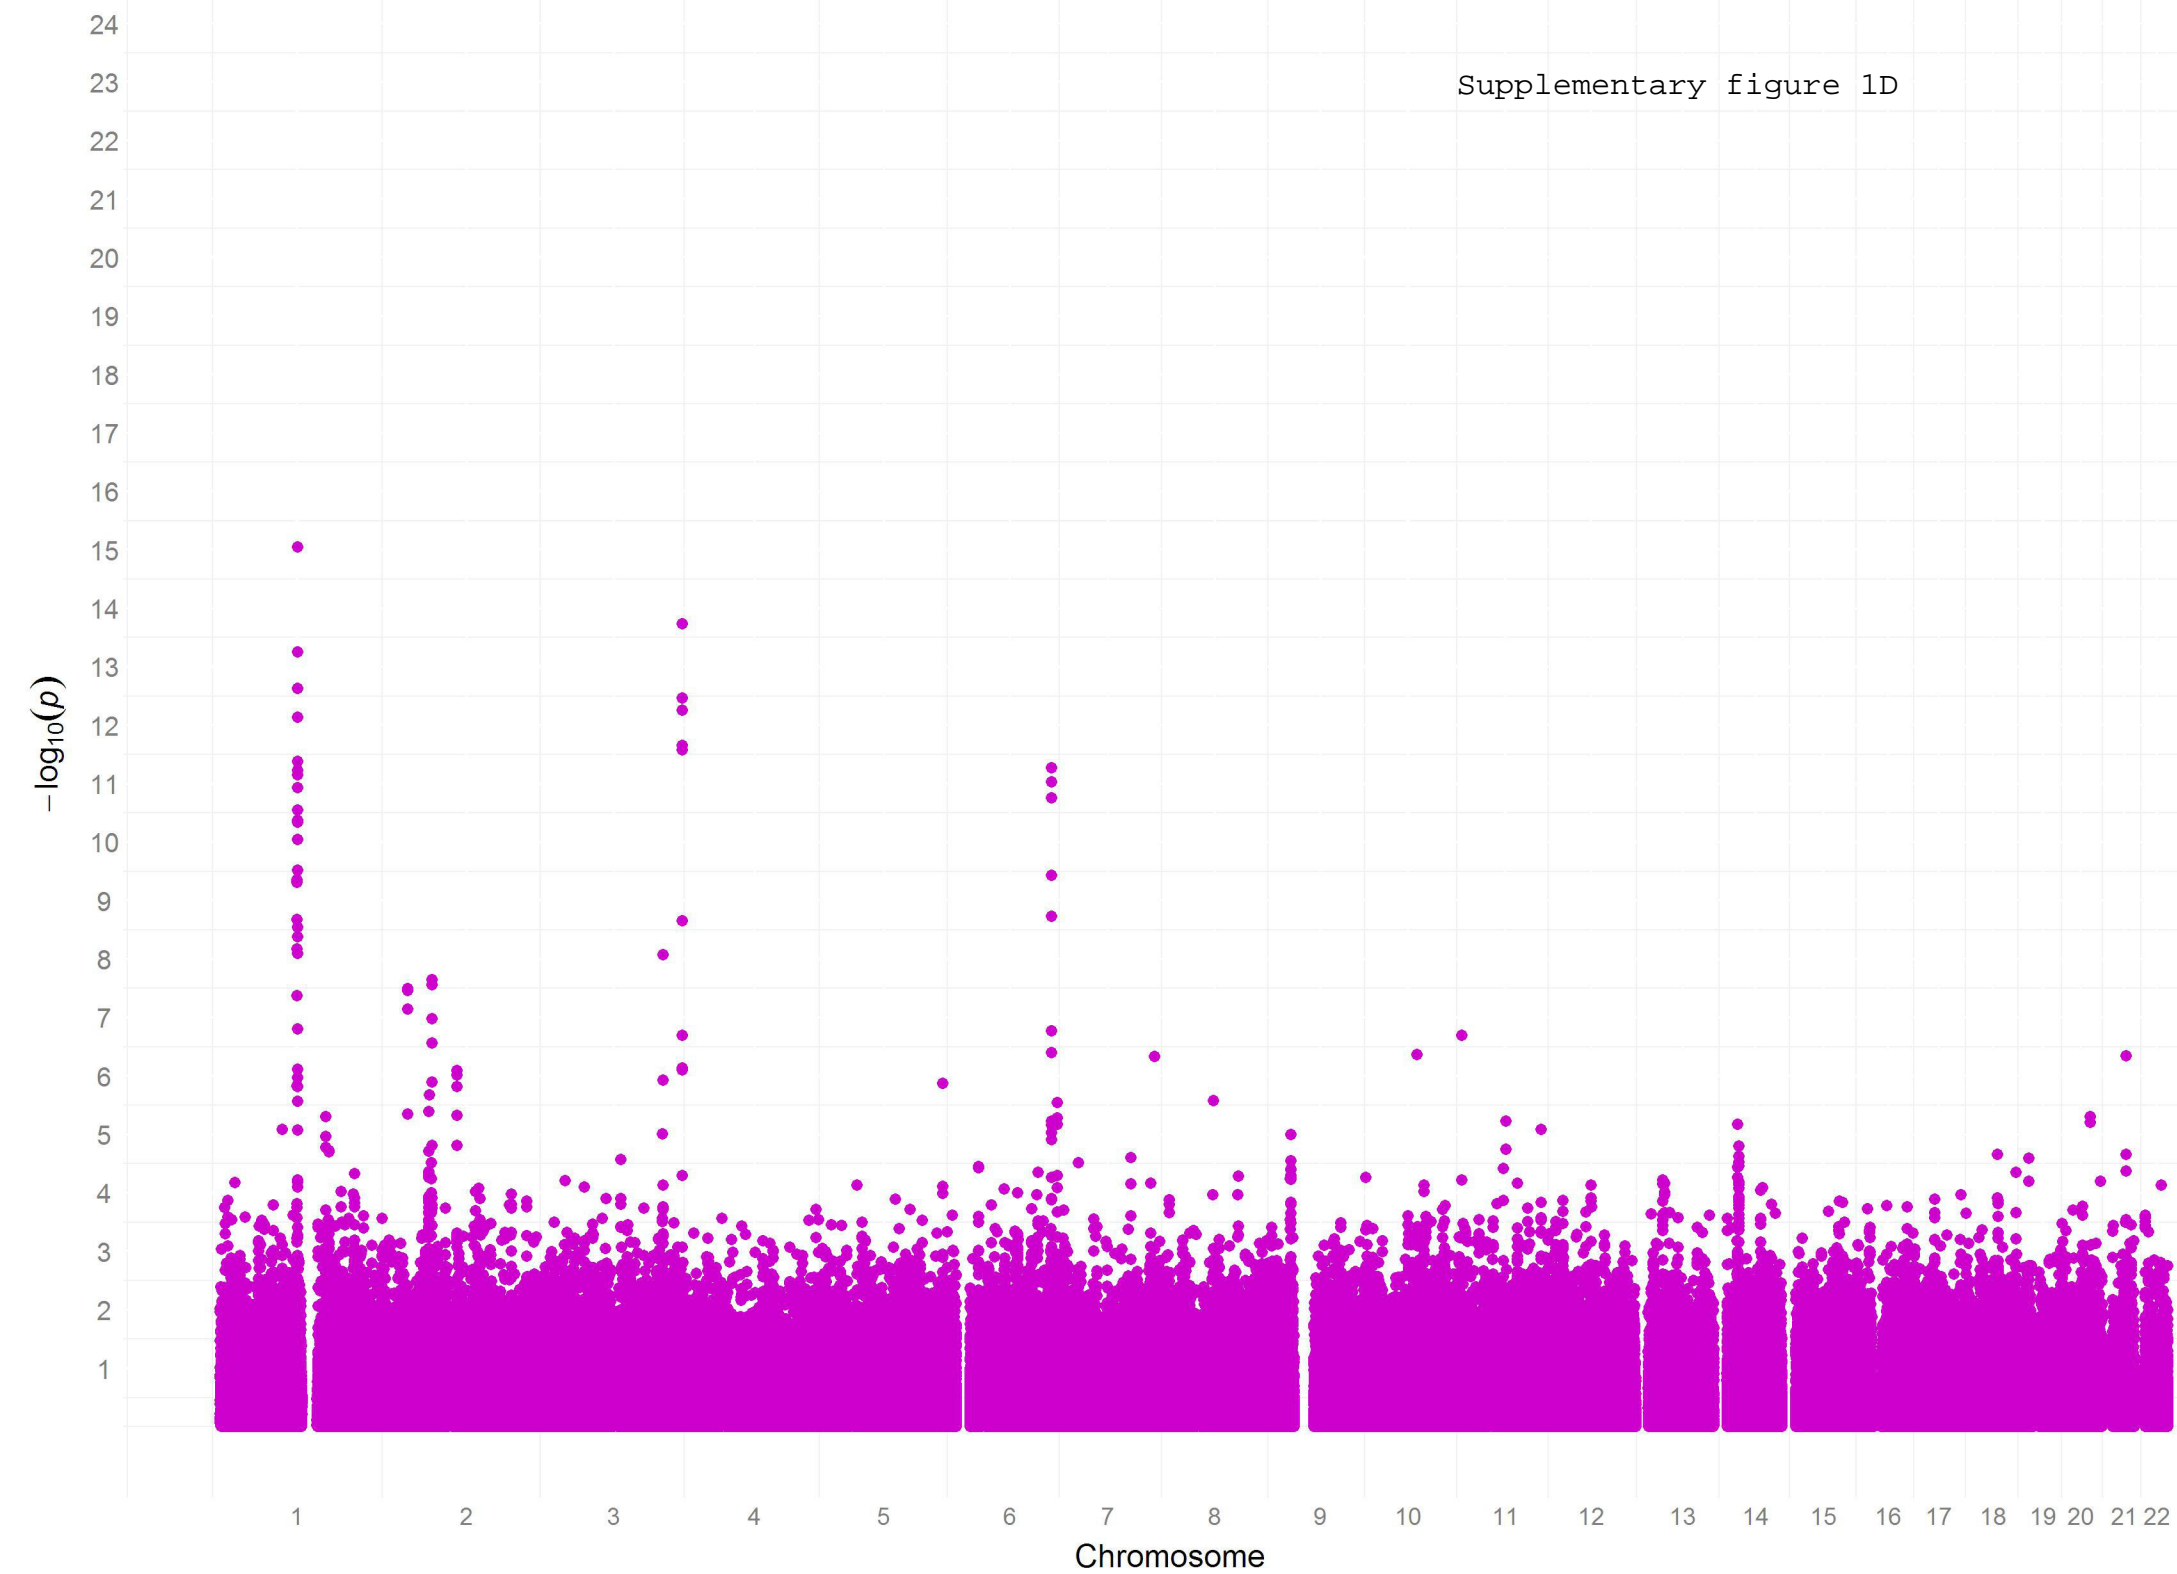

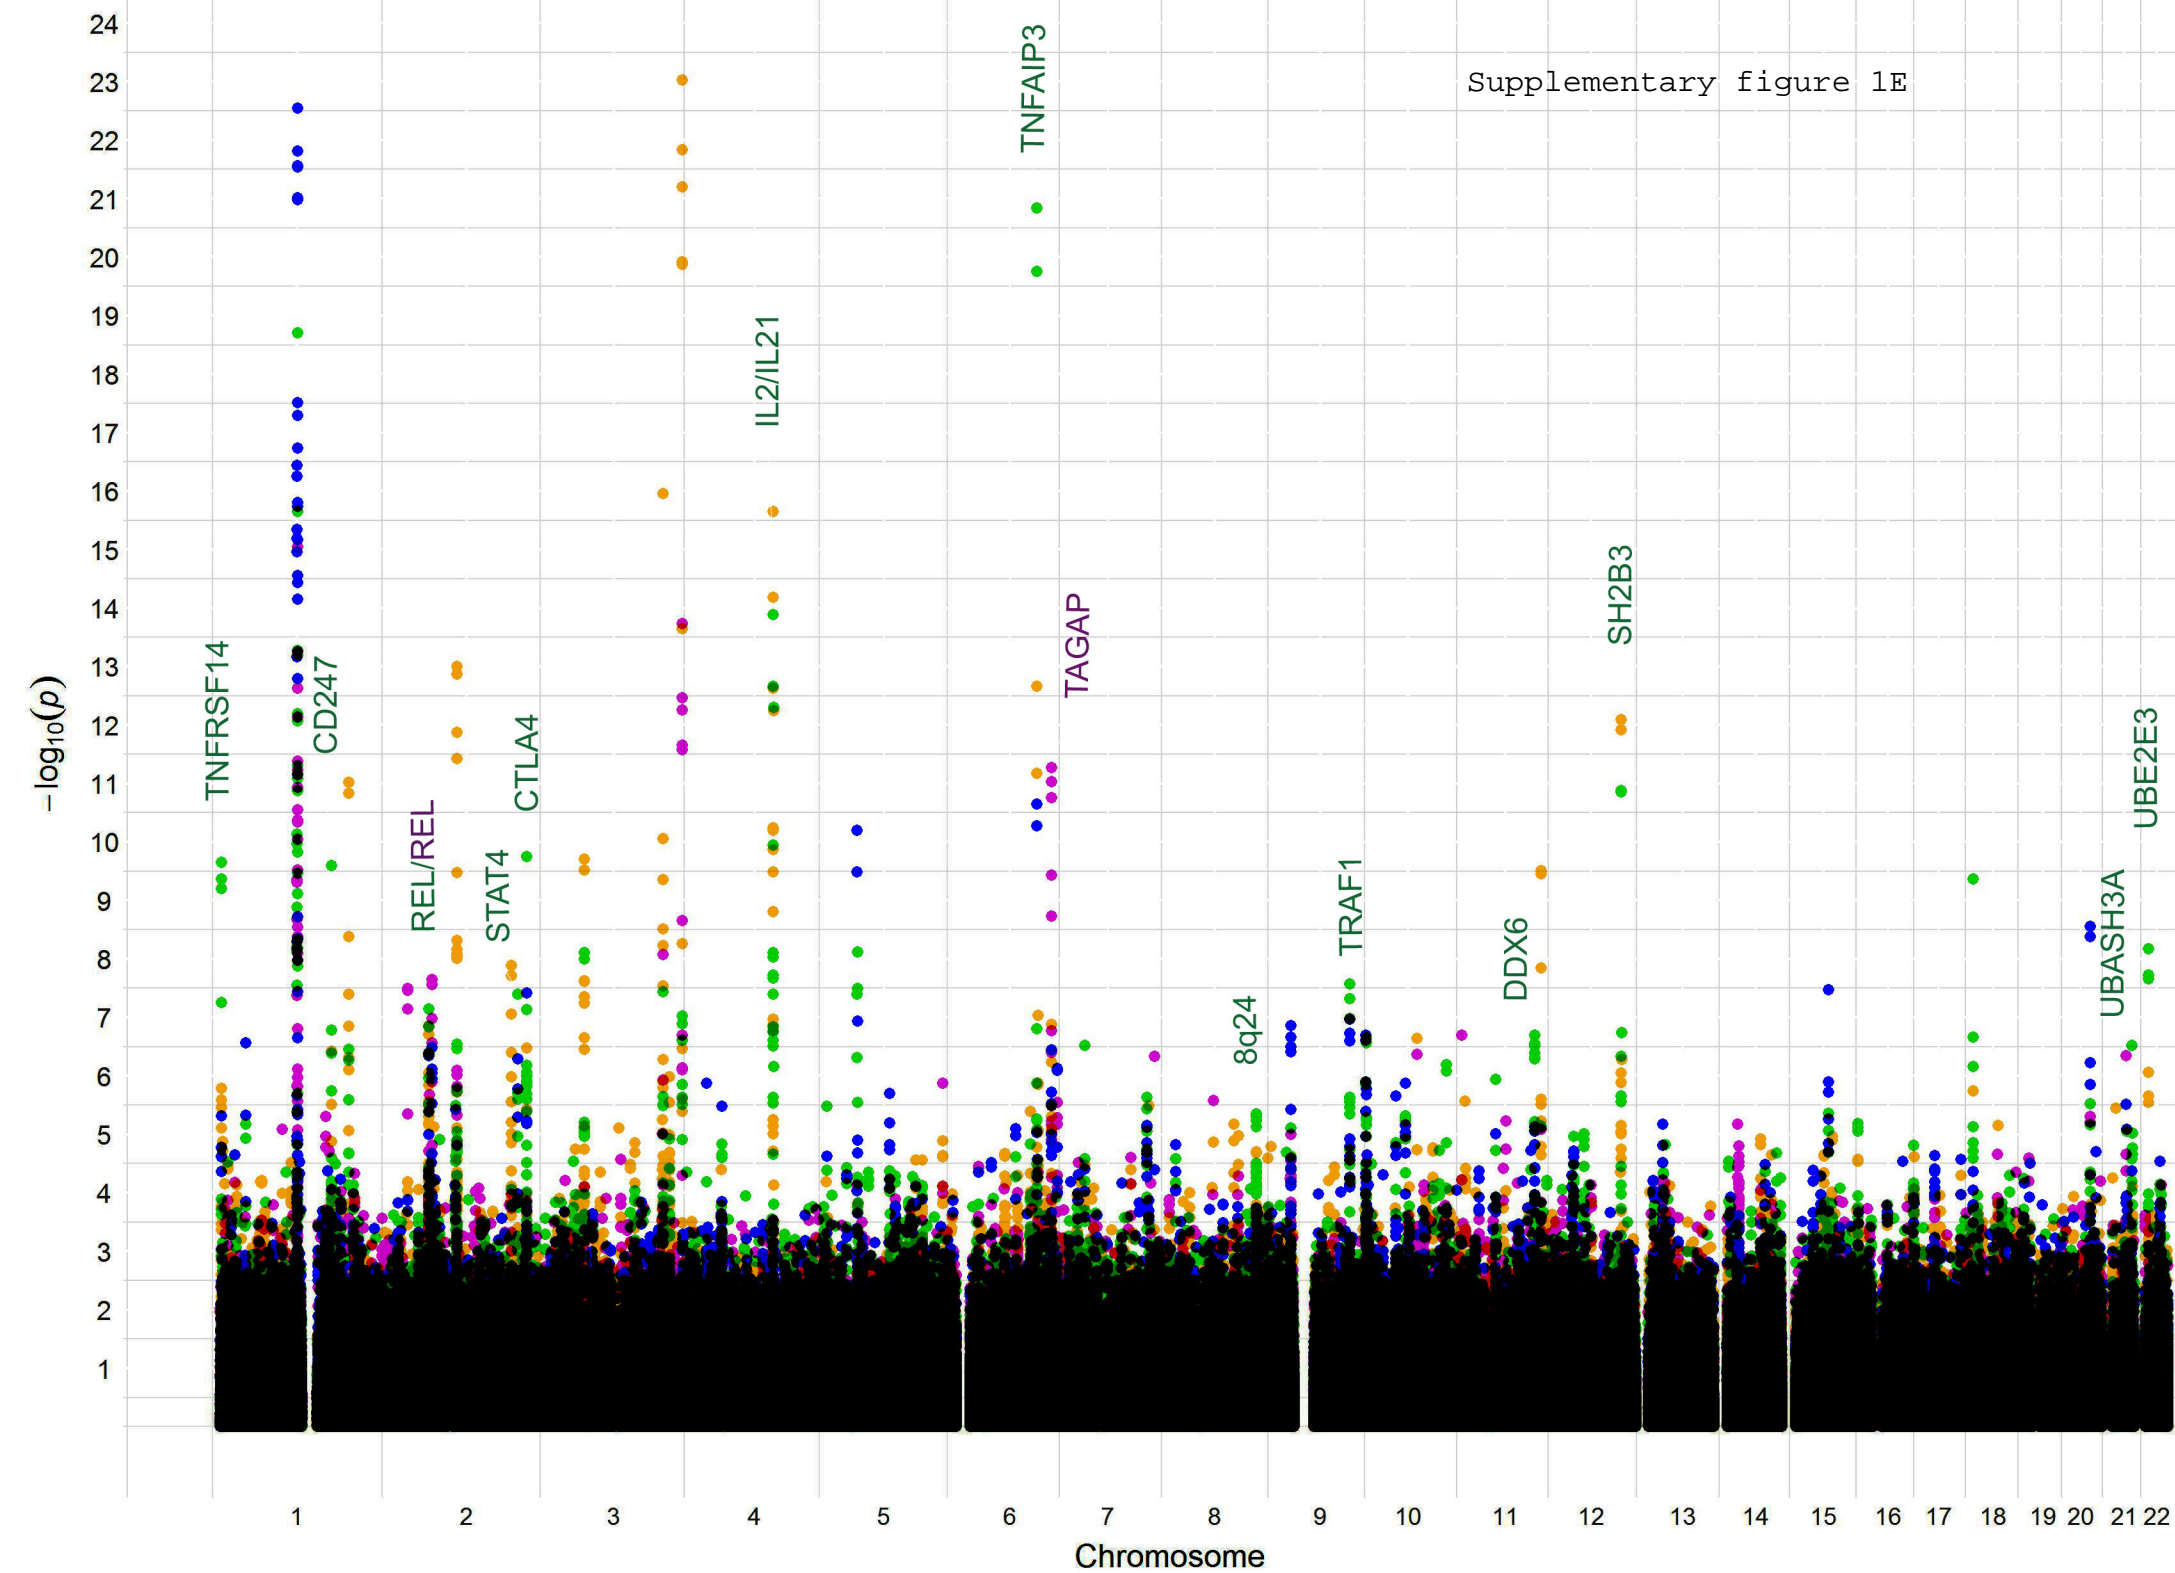

Supplement: pgen.1002004.s001.pdf [file pgen.1002004.s001.pdf]
